# Supplementary material for: Combination Therapy of Chloroquine and C2-Ceramide Enhances Cytotoxicity in Lung Cancer H460 and H1299 Cells
Source: MDPI journal article supplement (doi:10.3390/cancers11030370), 2019-03-15
Supplement: s1 [file s1]

# Supplementary material: Combination Therapy of Chloroquine and C<sub>2</sub>-Ceramide Enhances Cytotoxicity in Lung Cancer H460 and H1299 Cells

Han-Lin Chou, Yi-Hsiung Lin, Wangta Liu, Chang-Yi Wu, Ruei-Nian Li, Hung-Wern Huang, Chi-Hsien Chou, Shean-Jaw Chiou and Chien-Chih Chiu

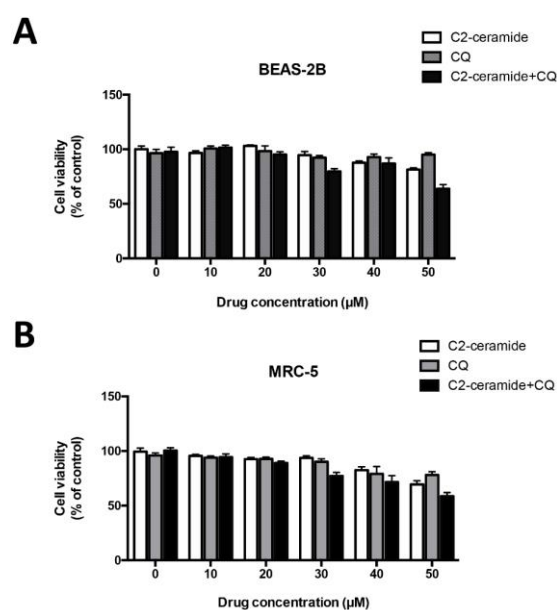

**Figure S1.** The cell viability determination of normal lung cells with C<sub>2</sub>-ceramide and CQ cotreatment. The cytotoxicity of C<sub>2</sub>-ceramide and CQ combined treatment was investigated in normal lung cells including (A) BEAS-2B and (B) MRC-5. The cells were incubated with the indicated concentrations of drugs for 24 hr. The equal concentration of two drugs was used in the group of combined treatment.

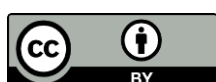

© 2019 by the authors. Licensee MDPI, Basel, Switzerland. This article is an open access article distributed under the terms and conditions of the Creative Commons Attribution (CC BY) license (<http://creativecommons.org/licenses/by/4.0/>).
